# Supplementary material for: Solid-state P-31 NMR study of octacalcium phosphate incorporated with succinate
Source: Royal Society of Chemistry journal article supplement (doi:10.1039/b923338e), 2010-01-01
Supplement: b923338e.pdf [file b923338e.pdf]

## Supporting Information

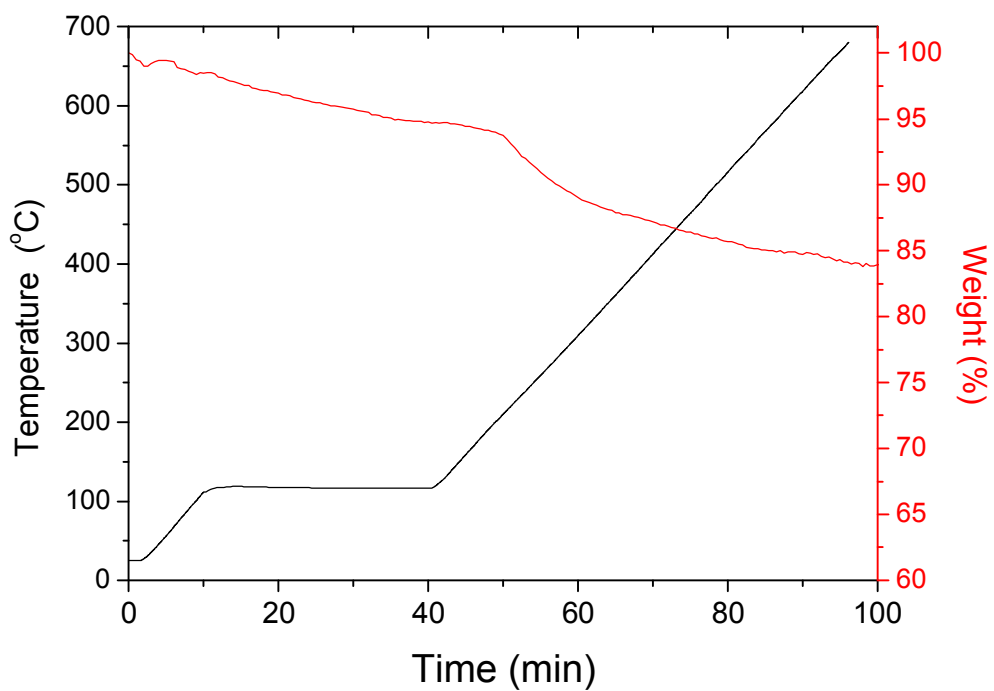

**Figure S1.** TGA results obtained for OCP.

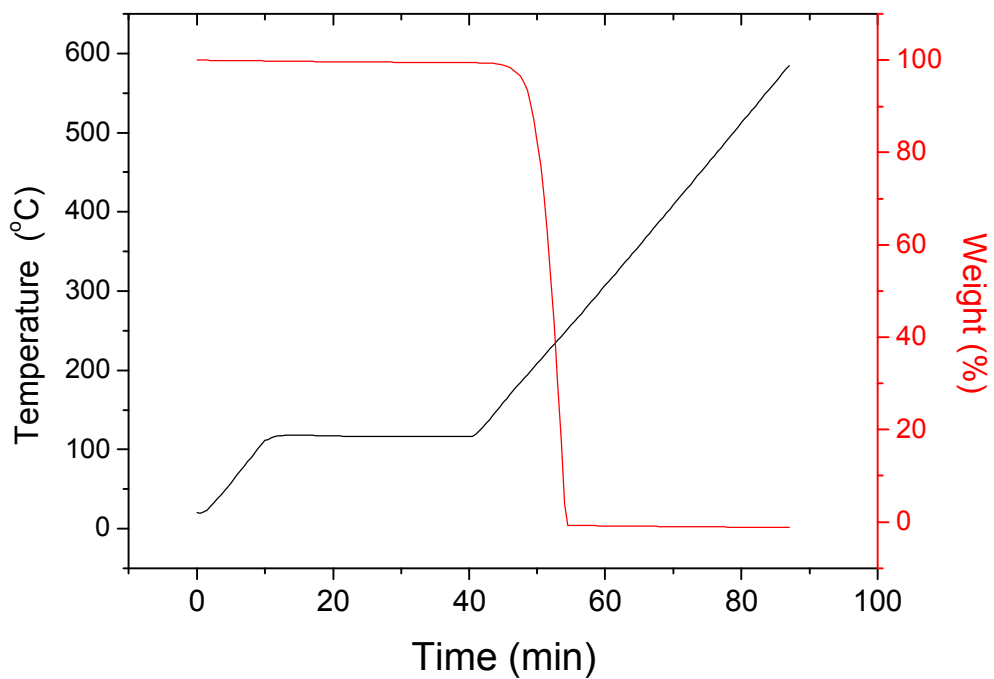

**Figure S2.** TGA results obtained for succinic acid.

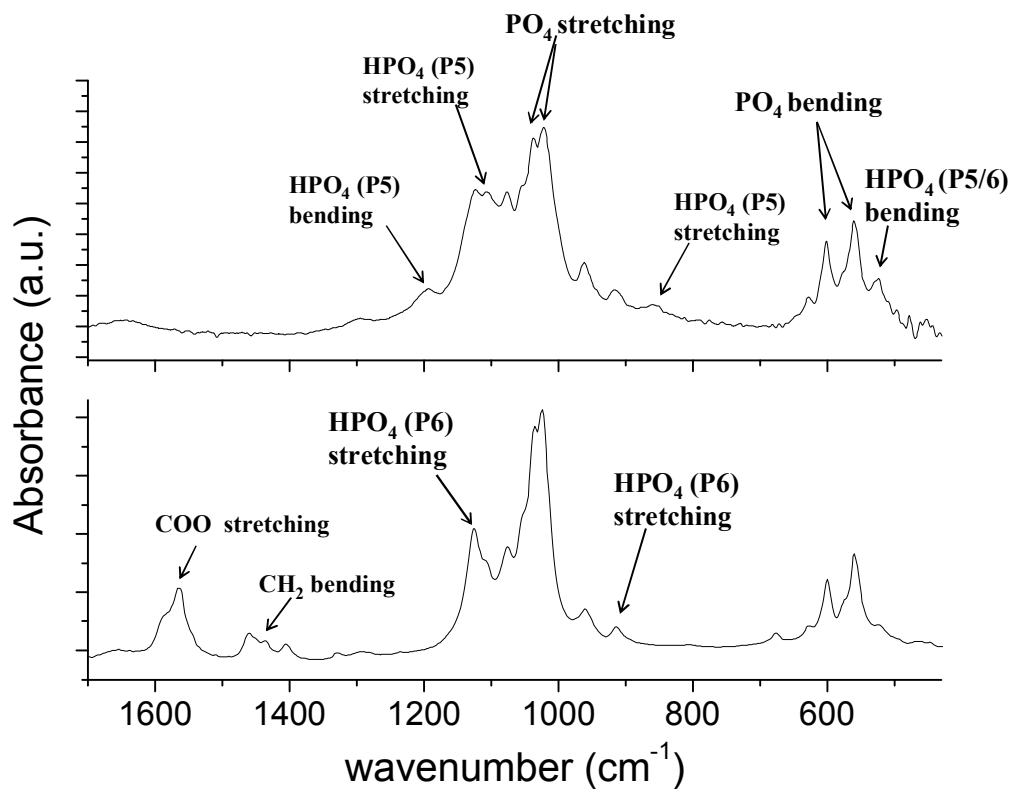

**Figure S3.** FT-IR spectra of OCP (upper trace) and OCPS (lower trace).

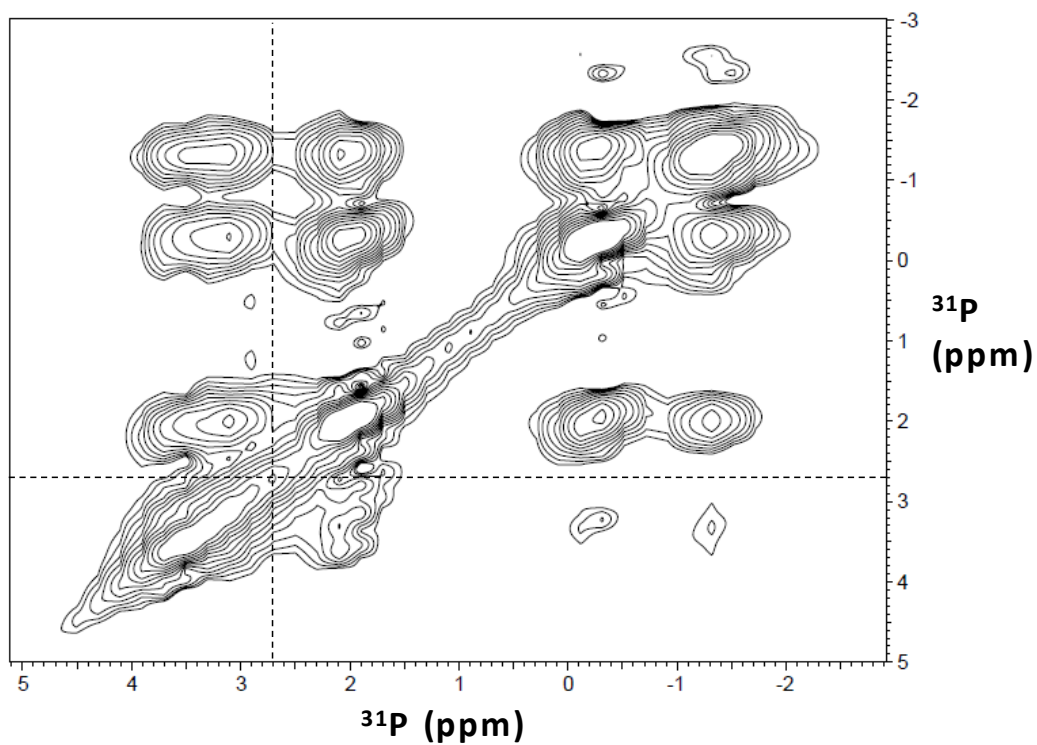

**Figure S4.** <sup>31</sup>P-<sup>31</sup>P DARR measurements with a mixing time of 300 ms. The dashed lines show the chemical shift of the HAp impurity phase.

## Determination of the proportionality constants between the van Vleck's second moment and the experimental DQ build-up rates for OCP

The proportionality constants between the van Vleck's second moment and the experimental DQ build-up rates were determined for OCP in the following way. Firstly, we made an assignment of the peak at  $-0.2$  ppm. Then we calculated the corresponding  $M_2$  values based on the X-ray crystal structure. Because there are three possible assignments of the peak at  $-0.2$  ppm for OCP, viz. P5/P6, P4/P5/P6, and P2/P5/P6, we had calculated three sets of proportionality constants as shown in Table S1 to S3.

**Table S1.** Proportionality constants between the van Vleck's second moment and the experimental DQ build-up rates determined for OCP. The signal at  $-0.2$  ppm is assigned to P5 and P6.

| Correlation peaks (ppm, ppm) | Assignments | A     | Calculated $M_2$ ( $\times 10^6$ rad <sup>2</sup> sec <sup>-2</sup> ) | $M_2/A$ ( $\times 10^6$ rad <sup>2</sup> sec <sup>-2</sup> ) |
|------------------------------|-------------|-------|-----------------------------------------------------------------------|--------------------------------------------------------------|
| 3.7, -0.2                    | P1-P5/6     | 0.926 | 0.347                                                                 | <b>0.375</b>                                                 |
| 3.3, -0.2                    | P2-P5/6     | 0.840 | 0.696                                                                 | <b>0.828</b>                                                 |
| 2.0, -0.2                    | P3-P5/6     | 0.710 | 1.076                                                                 | <b>1.516</b>                                                 |
| -0.2, -0.2                   | P5/6-P5/6   | 0.639 | 2.1082                                                                | <b>3.301</b>                                                 |
| 3.7, 3.7                     | P1-P1       | 1.148 | 3.222                                                                 | <b>2.806</b>                                                 |
| 3.7, 2.0                     | P1-P3       | 0.819 | 0.581                                                                 | <b>0.710</b>                                                 |

**Table S2.** Proportionality constants between the van Vleck's second moment and the experimental DQ build-up rates determined for OCP. The signal at  $-0.2$  ppm is assigned to P4, P5, and P6.

| Correlation peaks (ppm, ppm) | Assignments   | A     | Calculated $M_2$ ( $\times 10^6$ rad <sup>2</sup> sec <sup>-2</sup> ) | $M_2/A$ ( $\times 10^6$ rad <sup>2</sup> sec <sup>-2</sup> ) |
|------------------------------|---------------|-------|-----------------------------------------------------------------------|--------------------------------------------------------------|
| 3.7, -0.2                    | P1-P4/5/6     | 0.926 | 0.894                                                                 | <b>0.966</b>                                                 |
| 3.3, -0.2                    | P2-P4/5/6     | 0.840 | 0.789                                                                 | <b>0.939</b>                                                 |
| 2.0, -0.2                    | P3-P4/5/6     | 0.710 | 1.100                                                                 | <b>1.550</b>                                                 |
| -0.2, -0.2                   | P4/5/6-P4/5/6 | 0.639 | 1.405                                                                 | <b>2.200</b>                                                 |
| 3.7, 3.7                     | P1-P1         | 1.148 | 3.222                                                                 | <b>2.806</b>                                                 |
| 3.7, 2.0                     | P1-P3         | 0.819 | 0.581                                                                 | <b>0.710</b>                                                 |

**Table S3.** Proportionality constants between the van Vleck's second moment and the experimental DQ build-up rates determined for OCP. The signal at -0.2 ppm is assigned to P2, P5, and P6.

| Correlation peaks (ppm, ppm) | Assignments   | A     | Calculated $M_2$ ( $\times 10^6$ rad <sup>2</sup> sec <sup>-2</sup> ) | $M_2/A$ ( $\times 10^6$ rad <sup>2</sup> sec <sup>-2</sup> ) |
|------------------------------|---------------|-------|-----------------------------------------------------------------------|--------------------------------------------------------------|
| 3.7, -0.2                    | P1-P2/5/6     | 0.926 | 0.759                                                                 | <b>0.819</b>                                                 |
| 3.3, -0.2                    | P2-P2/5/6     | 0.840 | 0.536                                                                 | <b>0.638</b>                                                 |
| 2.0, -0.2                    | P3-P2/5/6     | 0.710 | 1.815                                                                 | <b>2.557</b>                                                 |
| -0.2, -0.2                   | P2/5/6-P2/5/6 | 0.639 | 1.270                                                                 | <b>1.989</b>                                                 |
| 3.7, 3.7                     | P1-P1         | 1.148 | 3.222                                                                 | <b>2.806</b>                                                 |
| 3.7, 2.0                     | P1-P3         | 0.819 | 0.581                                                                 | <b>0.710</b>                                                 |

**Table S4.** The calculated  $M_2$  of OCPS based on the assignment of  $P_A \rightarrow P6$  and  $P_B \rightarrow P5$ .

| Site          | Assignment | A     | Extracted $M_2$ of OCPS <sup>†</sup> ( $\times 10^6$ rad <sup>2</sup> sec <sup>-2</sup> ) | Calculated $M_2$ of OCP <sup>†</sup> ( $\times 10^6$ rad <sup>2</sup> sec <sup>-2</sup> ) |
|---------------|------------|-------|-------------------------------------------------------------------------------------------|-------------------------------------------------------------------------------------------|
| P1- $P_A$     | P1-P6      | 0.706 | 0.682                                                                                     | 0.60889                                                                                   |
| P1- $P_B$     | P1-P5      | 0.490 | 0.473                                                                                     | 0.0847                                                                                    |
| P3- $P_A$     | P3-P6      | 0.599 | 0.929                                                                                     | 1.5891                                                                                    |
| P3- $P_B$     | P3-P5      | 0.346 | 0.537                                                                                     | 0.5623                                                                                    |
| $P_A$ - $P_B$ | P5-P6      | 0.397 | 0.873                                                                                     | 1.3509                                                                                    |

<sup>†</sup> The proportionality constants ( $M_2/A$ ) were taken from Table S2. <sup>‡</sup> The  $M_2$  values were calculated based on the X-ray crystal structure.

**Table S5.** The calculated  $M_2$  of OCPS based on the assignment of  $P_A \rightarrow P5$  and  $P_B \rightarrow P6$ .

| Site          | Assignment | A     | Extracted $M_2$ of OCPS <sup>†</sup> ( $\times 10^6$ rad <sup>2</sup> sec <sup>-2</sup> ) | Calculated $M_2$ of OCP <sup>†</sup> ( $\times 10^6$ rad <sup>2</sup> sec <sup>-2</sup> ) |
|---------------|------------|-------|-------------------------------------------------------------------------------------------|-------------------------------------------------------------------------------------------|
| P1- $P_A$     | P1-P5      | 0.706 | 0.682                                                                                     | 0.0847                                                                                    |
| P1- $P_B$     | P1-P6      | 0.490 | 0.473                                                                                     | 0.60889                                                                                   |
| P3- $P_A$     | P3-P5      | 0.599 | 0.929                                                                                     | 0.5623                                                                                    |
| P3- $P_B$     | P3-P6      | 0.346 | 0.537                                                                                     | 1.5891                                                                                    |
| $P_A$ - $P_B$ | P5-P6      | 0.397 | 0.873                                                                                     | 1.3509                                                                                    |

<sup>†</sup> The proportionality constants ( $M_2/A$ ) were taken from Table S2. <sup>‡</sup> The  $M_2$  values were calculated based on the X-ray crystal structure.

As shown in the crystal structure of OCP, P4 is more likely to react with water to form the species of  $\text{HPO}_4^{2-}$ . Therefore, in the main text of our manuscript, we chose to employ the entries of Table S2 to calculate the  $M_2$  values of OCPS. Nevertheless, the same conclusion shown in Figure 7 was obtained when we employed the entries of Table S1 or S3.

## Determination of the chemical formula of OCPS and the overall Ca/P ratio

**Table S6.** Summary of the  $^{31}\text{P}$  NMR spin counting data.

|                                                     | HAp     | OCP     | OCPS             |
|-----------------------------------------------------|---------|---------|------------------|
| P-31 signal integral (a.u.)                         | 1.0     | 2.3     | 1.1 <sup>a</sup> |
| Sample mass (mg)                                    | 37.9    | 26.9    | 15.0             |
| Mw (g/mol)                                          | 1004.0  | 982.6   | --               |
| Number of scan                                      | 4       | 12      | 12               |
| # of P-31 per formula unit                          | 6       | 6       |                  |
| # of mole of P-31 ( $10^{-3}$ )                     | 0.22649 | 0.16426 |                  |
| Integral per scan per mole of P-31 spins ( $10^3$ ) | 1.1038  | 1.16684 |                  |

<sup>a</sup> The contribution of the impurity phase has been subtracted.

The average integral per scan per mole of P-31 spins was equal to  $1.135 \times 10^3$ , from which the number of mole of P-31 spins per unit mg of OCPS was calculated as  $1.1 / 12 / (1.135 \times 10^3) / 15 = 5.38 \times 10^{-6}$ .

By comparing the  $^{13}\text{C}$  Bloch decay spectra of OCPS and L-alanine, the number of mole of succinate ions per unit mg of OCPS was found to be  $5.49 \times 10^{-7}$ .

Assuming that the formula of OCPS is  $\text{Ca}_{8-y/2}(\text{HPO}_4)_{2-x}(\text{PO}_4)_{4-y}(\text{succinate})_{x+y} \cdot z\text{H}_2\text{O}$ :  
 $5.49 \times 10^{-7} : 5.38 \times 10^{-6} = (x + y) : [6 - (x + y)]$   
 $\Rightarrow x + y = 0.56$

From the deconvolution data, the ratio of the integrals of  $\text{HPO}_4^{2-} : \text{PO}_4^{3-}$  is calculated as

$$\frac{1.38}{2.72} = \frac{2-x}{4-y}$$

$$\Rightarrow x = \mathbf{0.17} \quad \text{and} \quad y = \mathbf{0.39}$$

Therefore, the molecular formula of OCPS is found to be:

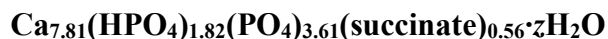

Hence the amount of  $\text{Ca}^{2+}$  due to OCPS is calculated as  $5.38 \times 10^{-6} \times 7.81 / (1.82 + 3.61) = \mathbf{7.74 \times 10^{-6}}$ .

Based on  $^{31}\text{P}$  integral ratio of the HAp (impurity phase) and OCPS, the amount of  $^{31}\text{P}$  due to HAp is calculated as  $5.38 \times 10^{-6} \times 0.64 / 4.10 = \mathbf{8.40 \times 10^{-7}}$ .

Assuming that the HAp phase has a perfect stoichiometry, the amount of Ca ions due to HAp is then calculated as  $8.40 \times 10^{-7} \times 1.67 = \mathbf{1.40 \times 10^{-6}}$ .

Overall, the Ca/P ratio of our OCPS sample is calculated as

$$\frac{(7.74 + 1.40)}{(5.44 + 0.84)} = \mathbf{1.46}$$
